# Supplementary material for: Enhancing the magnetic properties of Dy(iii) single-molecule magnets in octahedral coordination symmetry by tuning the equatorial ligands
Source: Royal Society of Chemistry journal article supplement (doi:10.1039/d4dt02482f), 2024-01-01
Supplement: d4dt02482f1.pdf [file d4dt02482f1.pdf]

Electronic Supporting Information for:

# **Enhancing magnetic properties of Dy(III) single-molecule magnets in octahedral coordination symmetry by tuning the equatorial ligands**

Xiao-Han Peng,<sup>a</sup> Tao Shang,<sup>a</sup> Jieyu Zheng,<sup>a, b</sup> Ming Liu,<sup>a</sup> Qi Zheng,<sup>a</sup> and Fu-Sheng Guo<sup>\*a</sup>

<sup>a</sup> Institute of Fundamental and Frontier Sciences, University of Electronic Science and Technology of China, Xiyuan Avenue 2006, Chengdu 611731 (China) E-mail: fu-sheng.guo@uestc.edu.cn

<sup>b</sup> Yusuf Hamied Department of Chemistry, University of Cambridge, Lensfield Road, Cambridge, CB2 1EW, UK

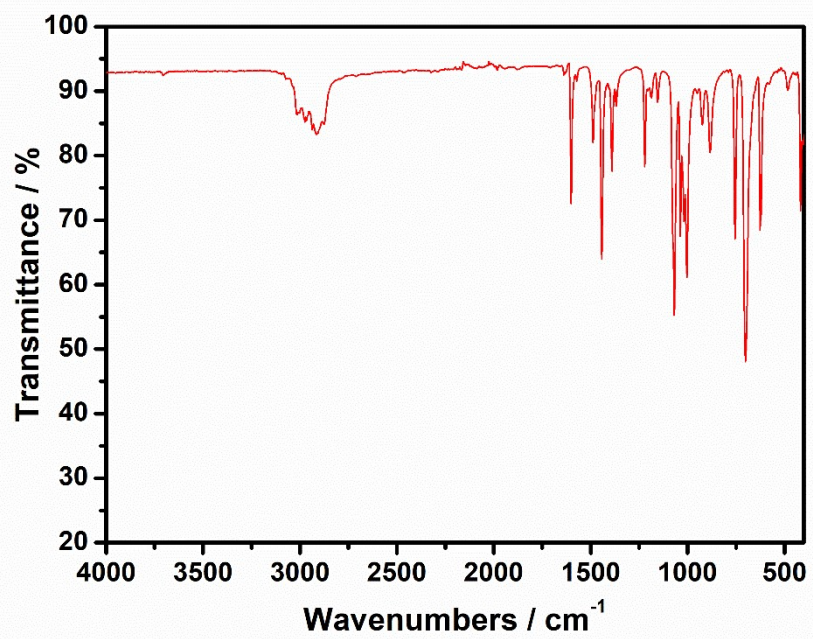

**Figure S1.** FT-IR spectrum of **1** under Ar atmosphere.

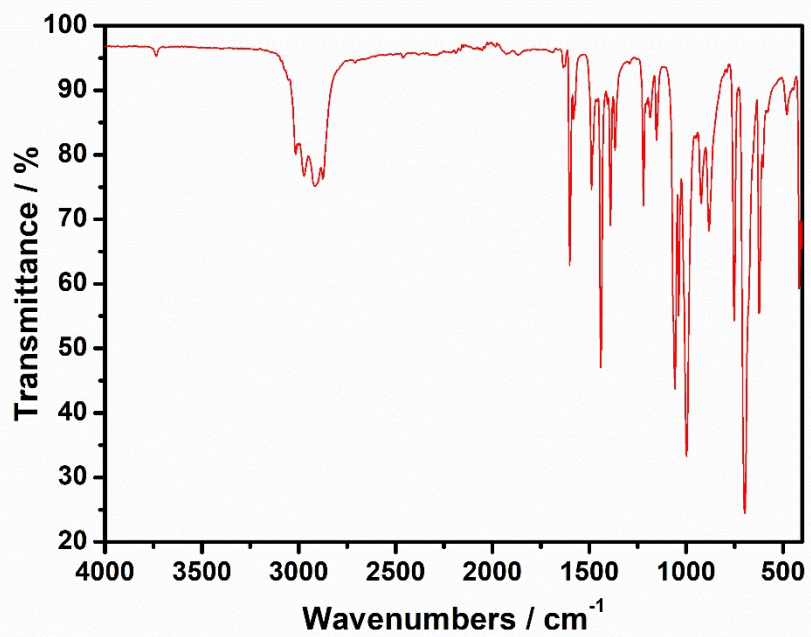

**Figure S2.** FT-IR spectrum of **2** under Ar atmosphere.

## X-ray crystallography

**Table S1.** Crystal data and structure refinement for **1** and **2**.

| identification code                         | [Dy(OC <sup>t</sup> Bu <sub>3</sub> )Cl <sub>2</sub> (py <sub>3</sub> )] ( <b>1</b> ) | [Dy(OC <sup>t</sup> Bu <sub>3</sub> )I <sub>2</sub> (py <sub>3</sub> )] ( <b>2</b> ) |
|---------------------------------------------|---------------------------------------------------------------------------------------|--------------------------------------------------------------------------------------|
| Empirical formula                           | C <sub>28</sub> H <sub>42</sub> Cl <sub>2</sub> DyN <sub>3</sub> O                    | C <sub>28</sub> H <sub>42</sub> DyI <sub>2</sub> N <sub>3</sub> O                    |
| Formula weight                              | 670.04                                                                                | 852.94                                                                               |
| Temperature/K                               | 150.0                                                                                 | 150                                                                                  |
| Crystal system                              | orthorhombic                                                                          | orthorhombic                                                                         |
| Space group                                 | <i>P</i> 2 <sub>1</sub> 2 <sub>1</sub> 2 <sub>1</sub>                                 | <i>P</i> 2 <sub>1</sub> 2 <sub>1</sub> 2 <sub>1</sub>                                |
| <i>a</i> /Å                                 | 8.8925(7)                                                                             | 9.1597(6)                                                                            |
| <i>b</i> /Å                                 | 18.1625(16)                                                                           | 18.4547(12)                                                                          |
| <i>c</i> /Å                                 | 18.7460(17)                                                                           | 19.0883(10)                                                                          |
| $\alpha$ /°                                 | 90                                                                                    | 90                                                                                   |
| $\beta$ /°                                  | 90                                                                                    | 90                                                                                   |
| $\gamma$ /°                                 | 90                                                                                    | 90                                                                                   |
| Volume/Å <sup>3</sup>                       | 3027.7(5)                                                                             | 3226.7(3)                                                                            |
| <i>Z</i>                                    | 4                                                                                     | 4                                                                                    |
| $\rho_{\text{calc}}$ /g/cm <sup>3</sup>     | 1.470                                                                                 | 1.756                                                                                |
| $\mu$ /mm <sup>-1</sup>                     | 2.668                                                                                 | 4.252                                                                                |
| F(000)                                      | 1356.0                                                                                | 1644.0                                                                               |
| Crystal size/mm <sup>3</sup>                | 0.44 × 0.24 × 0.11                                                                    | 0.08 × 0.07 × 0.05                                                                   |
| Radiation                                   | MoK $\alpha$ ( $\lambda$ = 0.71073)                                                   | MoK $\alpha$ ( $\lambda$ = 0.71073)                                                  |
| 2 $\Theta$ range for data collection/°      | 4.486 to 53.994                                                                       | 4.268 to 52.992                                                                      |
| Index ranges                                | -11 ≤ <i>h</i> ≤ 11, -23 ≤ <i>k</i> ≤ 21,<br>-23 ≤ <i>l</i> ≤ 23                      | -11 ≤ <i>h</i> ≤ 11, -23 ≤ <i>k</i> ≤ 23,<br>-23 ≤ <i>l</i> ≤ 23                     |
| Reflections collected                       | 28152                                                                                 | 31180                                                                                |
| Independent reflections                     | 6610 [ $R_{\text{int}}$ = 0.0538, $R_{\text{sigma}}$ = 0.0495]                        | 6688 [ $R_{\text{int}}$ = 0.0675, $R_{\text{sigma}}$ = 0.0543]                       |
| Data/restraints/parameters                  | 6610/58/365                                                                           | 6688/36/350                                                                          |
| Goodness-of-fit on F <sup>2</sup>           | 1.019                                                                                 | 1.022                                                                                |
| Final R indexes [ $I \geq 2\sigma$ (I)]     | $R_1$ = 0.0309, $wR_2$ = 0.0637                                                       | $R_1$ = 0.0366, $wR_2$ = 0.0640                                                      |
| Final R indexes [all data]                  | $R_1$ = 0.0415, $wR_2$ = 0.0673                                                       | $R_1$ = 0.0579, $wR_2$ = 0.0732                                                      |
| Largest diff. peak/hole / e Å <sup>-3</sup> | 0.42/-0.59                                                                            | 0.71/-0.72                                                                           |

**Table S2** Selected bond lengths (Å) and angles (deg) in complex **1** and **2**.

| <b>Bond/Angle</b> | <b>[Dy(OC'Bu<sub>3</sub>)Cl<sub>2</sub>(py<sub>3</sub>)] (1)</b> | <b>[Dy(OC'Bu<sub>3</sub>)I<sub>2</sub>(py<sub>3</sub>)] (2)</b> |
|-------------------|------------------------------------------------------------------|-----------------------------------------------------------------|
| Dy1-X1            | 2.6158(15)                                                       | 3.0324(9)                                                       |
| Dy1-X2            | 2.6398(17)                                                       | 3.0690(9)                                                       |
| Dy1-O1            | 2.033(4)                                                         | 2.016(6)                                                        |
| Dy1-N1            | 2.502(6)                                                         | 2.507(9)                                                        |
| Dy1-N2            | 2.504(5)                                                         | 2.512(8)                                                        |
| Dy1-N3            | 2.601(5)                                                         | 2.597(7)                                                        |
| X1-Dy1-X2         | 161.50(6)                                                        | 159.22(3)                                                       |
| O1-Dy1-X1         | 96.40(12)                                                        | 96.8(2)                                                         |
| O1-Dy1-X2         | 102.06(11)                                                       | 103.9(2)                                                        |
| O1-Dy1-N1         | 99.46(16)                                                        | 99.8(3)                                                         |
| O1-Dy1-N2         | 94.45(16)                                                        | 94.1(3)                                                         |
| O1-Dy1-N3         | 172.82(19)                                                       | 173.3(4)                                                        |
| N1-Dy1-X1         | 89.57(13)                                                        | 89.2(2)                                                         |
| N1-Dy1-X2         | 86.20(13)                                                        | 85.1(2)                                                         |
| N1-Dy1-N2         | 165.13(17)                                                       | 165.2(3)                                                        |
| N1-Dy1-N3         | 85.97(19)                                                        | 85.3(3)                                                         |
| N2-Dy1-X1         | 94.12(13)                                                        | 94.1(2)                                                         |
| N2-Dy1-X2         | 85.76(13)                                                        | 86.7(2)                                                         |
| N2-Dy1-N3         | 80.65(18)                                                        | 81.2(3)                                                         |
| N3-Dy1-X1         | 78.84(14)                                                        | 78.8(2)                                                         |
| N3-Dy1-X2         | 82.89(14)                                                        | 80.9(2)                                                         |

**Table S3** Continuous Shape Measures (CShM) calculation for **1** and **2**.

| <b>Symmetry</b>                    | <b>[Dy(OC'Bu<sub>3</sub>)Cl<sub>2</sub>(py<sub>3</sub>)]</b> | <b>[Dy(OC'Bu<sub>3</sub>)I<sub>2</sub>(py<sub>3</sub>)]</b> |
|------------------------------------|--------------------------------------------------------------|-------------------------------------------------------------|
| HP-6 ( <i>D</i> <sub>6h</sub> )    | 33.17009                                                     | 33.50472                                                    |
| PPY-6 ( <i>C</i> <sub>5v</sub> )   | 26.22612                                                     | 26.27611                                                    |
| <b>OC-6 (<i>O</i><sub>h</sub>)</b> | <b>0.75769</b>                                               | <b>1.96724</b>                                              |
| TPR-6 ( <i>D</i> <sub>3h</sub> )   | 13.80195                                                     | 14.13883                                                    |
| JPPY-5 ( <i>C</i> <sub>5v</sub> )  | 29.3176                                                      | 28.60318                                                    |

## Magnetic property measurements

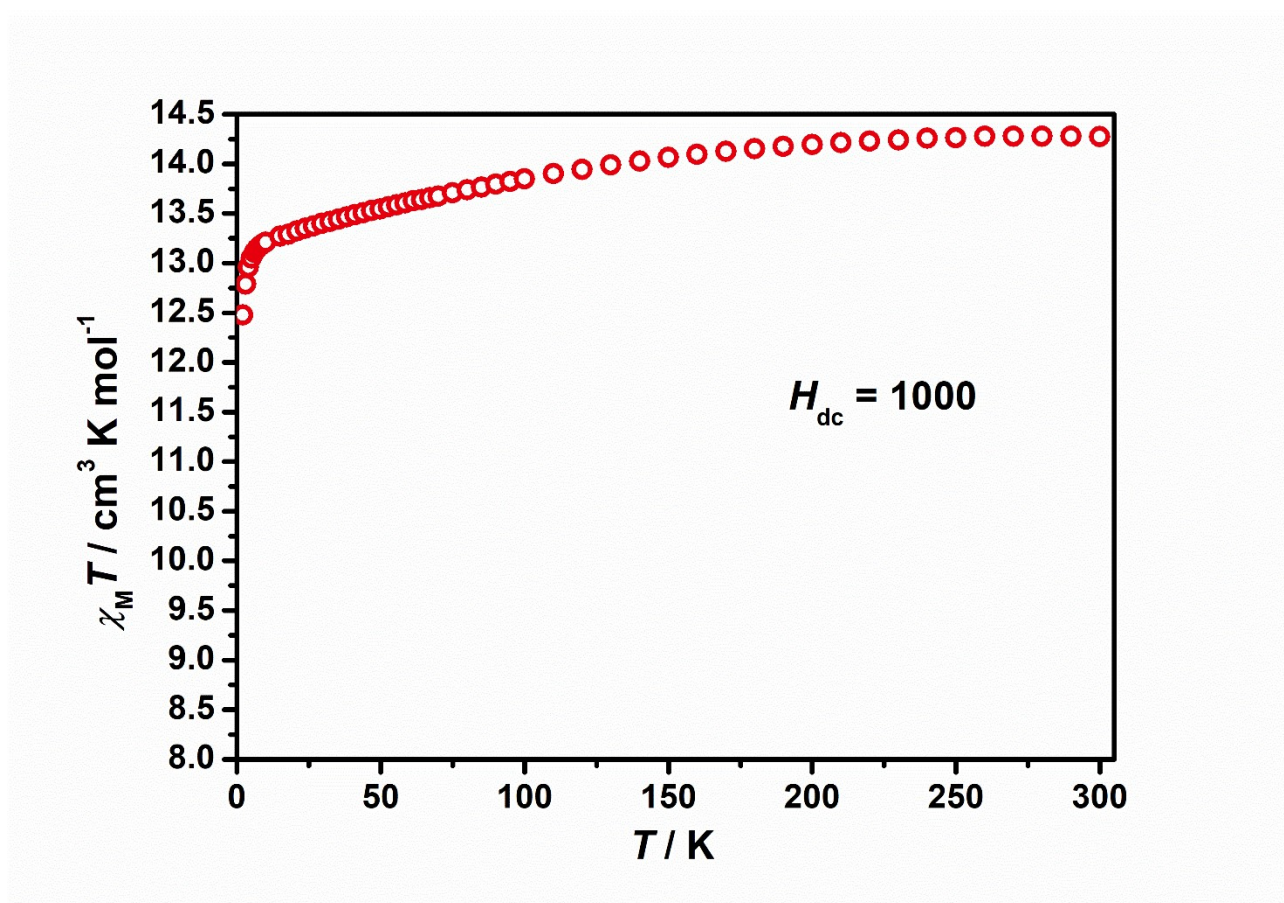

**Figure S3.** Measured  $\chi_M T$  versus temperature (red circles) for **1** under an applied magnetic field of 1 kOe.  $\chi_M T(300 \text{ K}) = 14.27 \text{ cm}^3 \text{K mol}^{-1}$ ,  $\chi_M T(2 \text{ K}) = 12.4 \text{ cm}^3 \text{K mol}^{-1}$ .

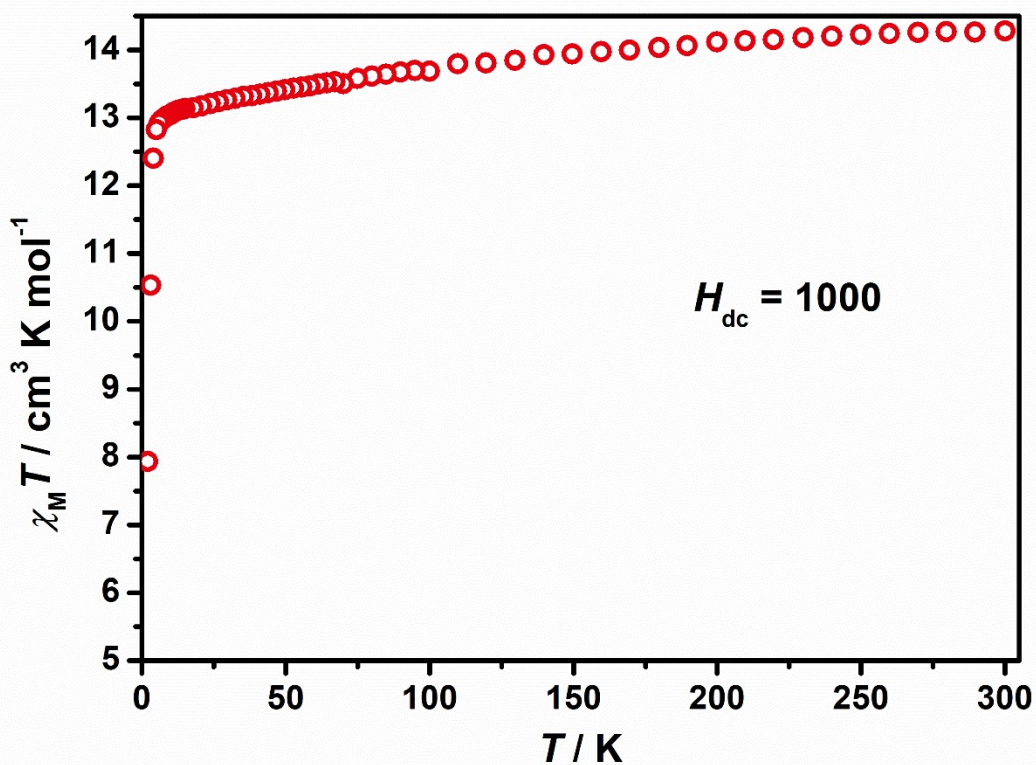

**Figure S4.** Measured  $\chi_M T$  versus temperature (red circles) for **2** under an applied magnetic field of 1 kOe.  $\chi_M T(300 \text{ K}) = 14.28 \text{ cm}^3 \text{ K mol}^{-1}$ ,  $\chi_M T(2 \text{ K}) = 7.93 \text{ cm}^3 \text{ K mol}^{-1}$ .

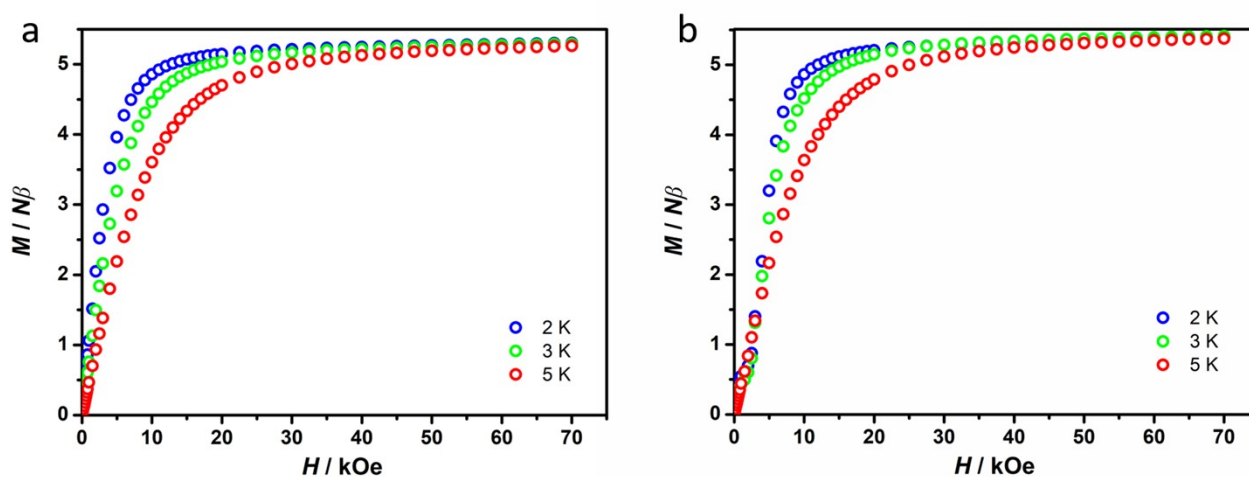

**Figure S5.** Variable-field magnetization data for complexes **1** (a) and **2** (b) at 2, 3 and 5 K

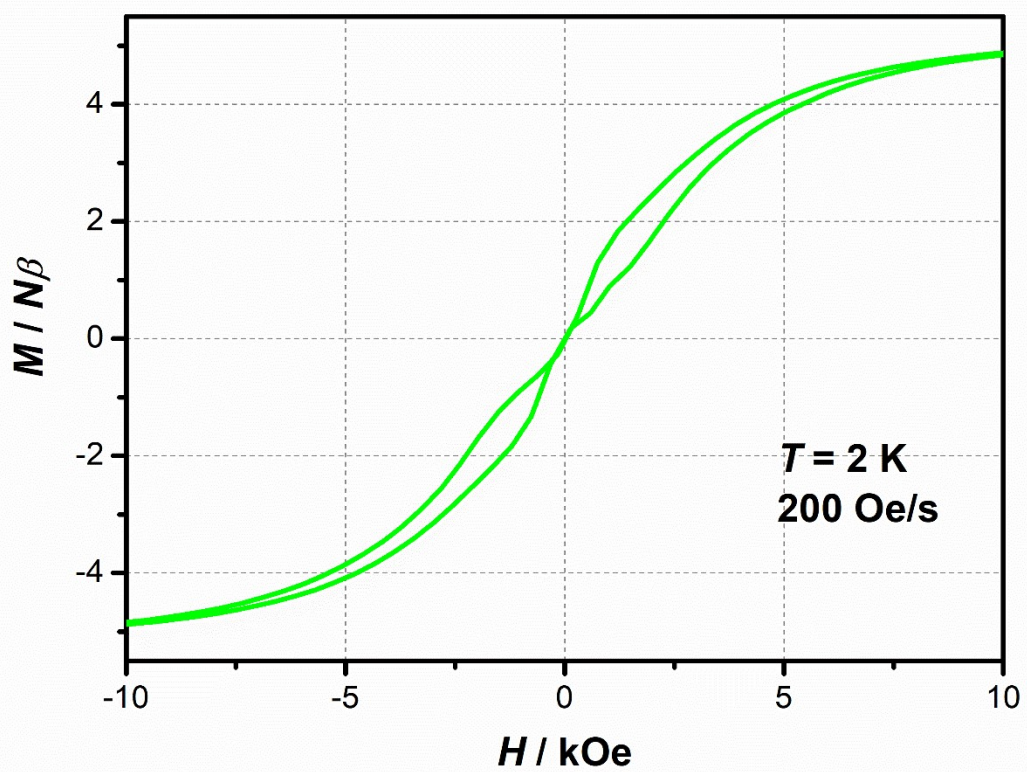

Figure S6. Magnetization vs. field hysteresis loop of **1** at 2 K using a field sweep rate of 200 Oe s<sup>-1</sup>.



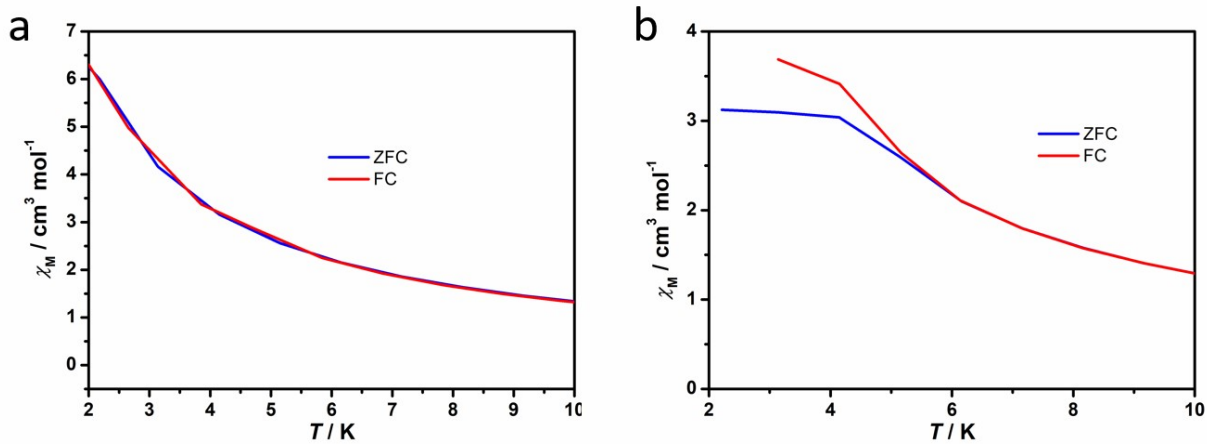

**Figure S7** Zero-field-cooled/field-cooled (ZFC-FC) magnetic susceptibilities under a dc field of 1 kOe for complexes **1** (a) and **2** (b).

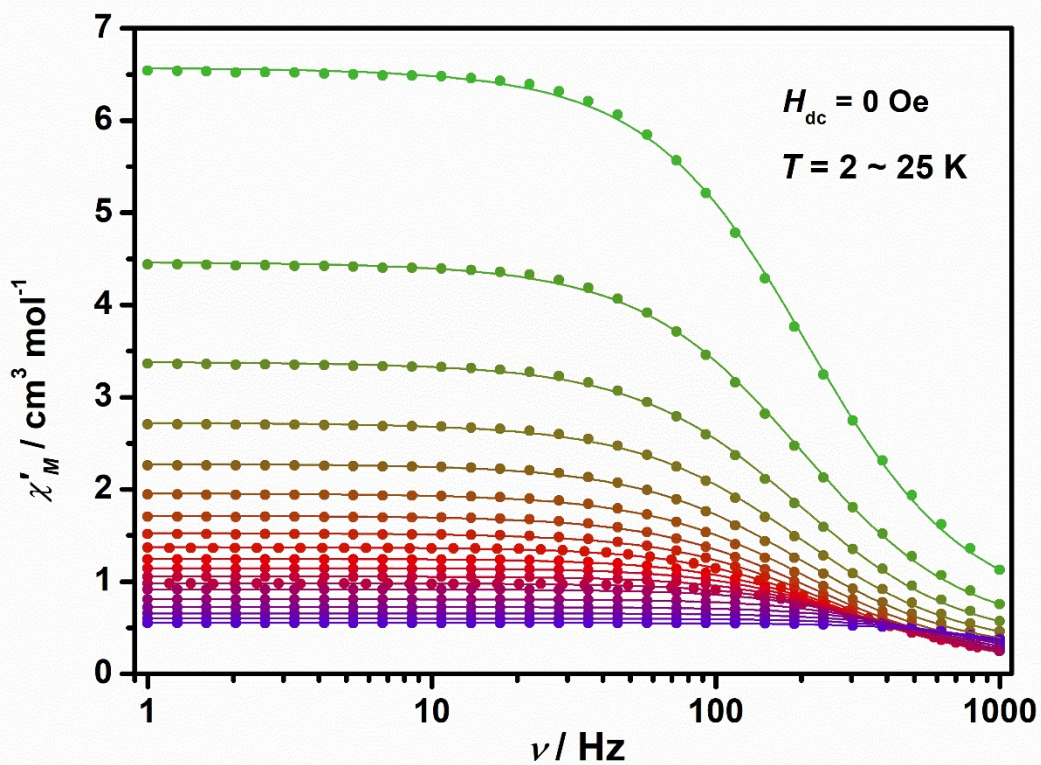

**Figure S8.** Frequency dependence of the in-phase susceptibility ( $\chi'_M$ ) for **1** under a zero DC field at AC frequencies of 0.1-1000 Hz from 2 to 70 K. Solid lines represent fits of the data using the generalized Debye model, which describe  $\chi$  and  $\chi'$  in terms of frequency, isothermal susceptibility ( $\chi_\infty$ ), adiabatic susceptibility ( $\chi_S$ ), relaxation time ( $\tau$ ), and a variable representing the distribution of relaxation times ( $\alpha$ ).

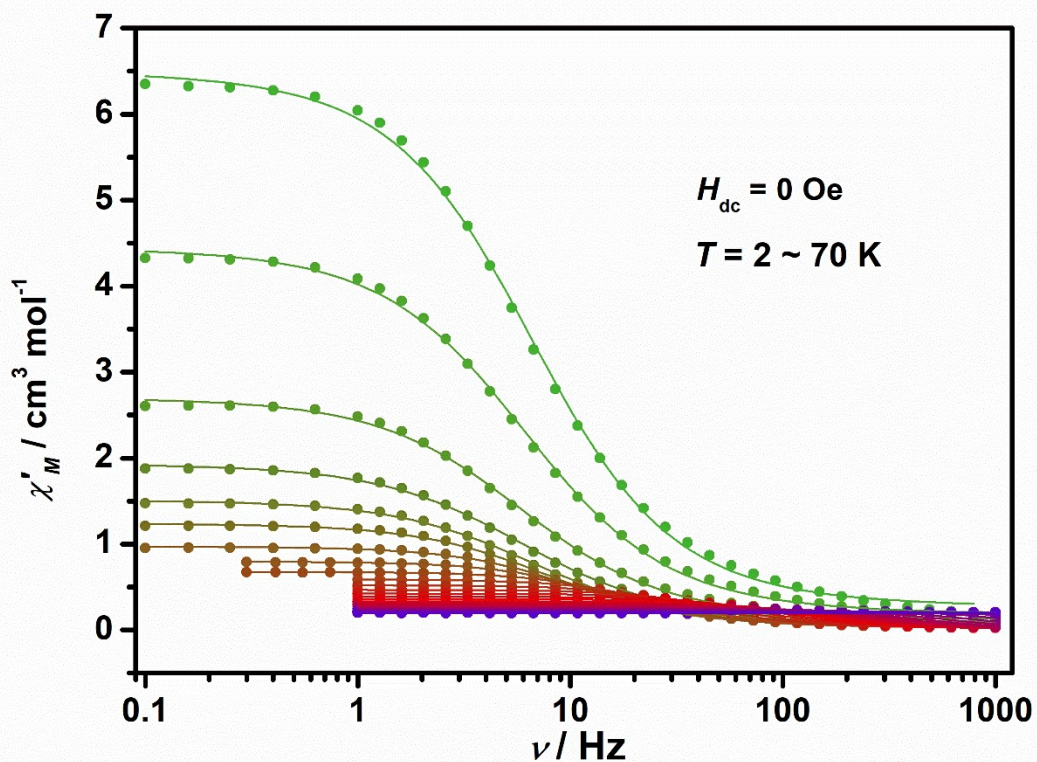

**Figure S9.** Frequency dependence of the in-phase susceptibility ( $\chi'_M$ ) for **2** under a zero DC field at AC frequencies of 0.1-999 Hz from 2 to 25 K. Solid lines represent fits of the data using the generalized Debye model, which describe  $\chi'$  and  $\chi''$  in terms of frequency, isothermal susceptibility ( $\chi_\infty$ ), adiabatic susceptibility ( $\chi_S$ ), relaxation time ( $\tau$ ), and a variable representing the distribution of relaxation times ( $\alpha$ ).

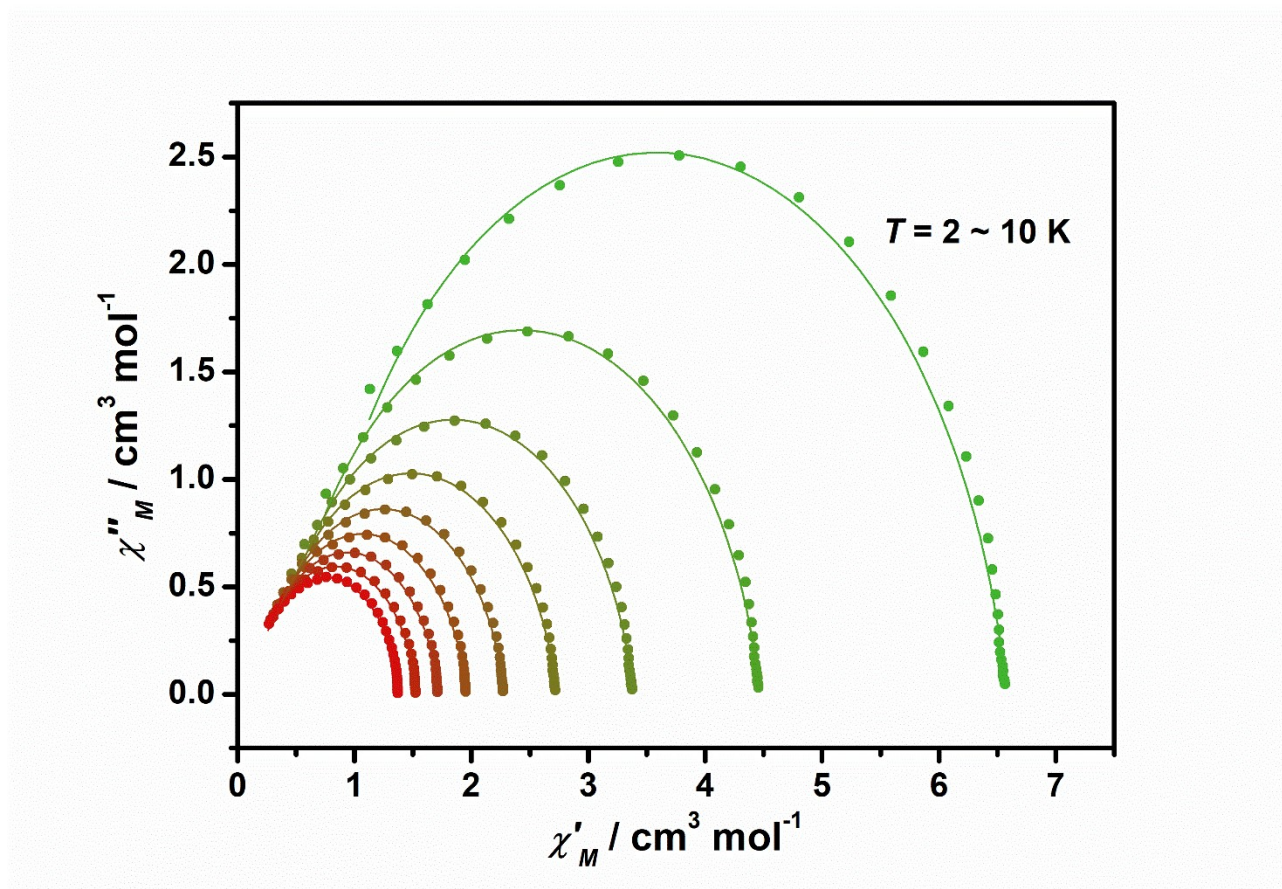

**Figure S10.** Cole–Cole plots for the AC susceptibilities under a zero DC field for **1** from 2-10 K. Solid lines represent fits of the data in Figure S6 using the generalized Debye model.

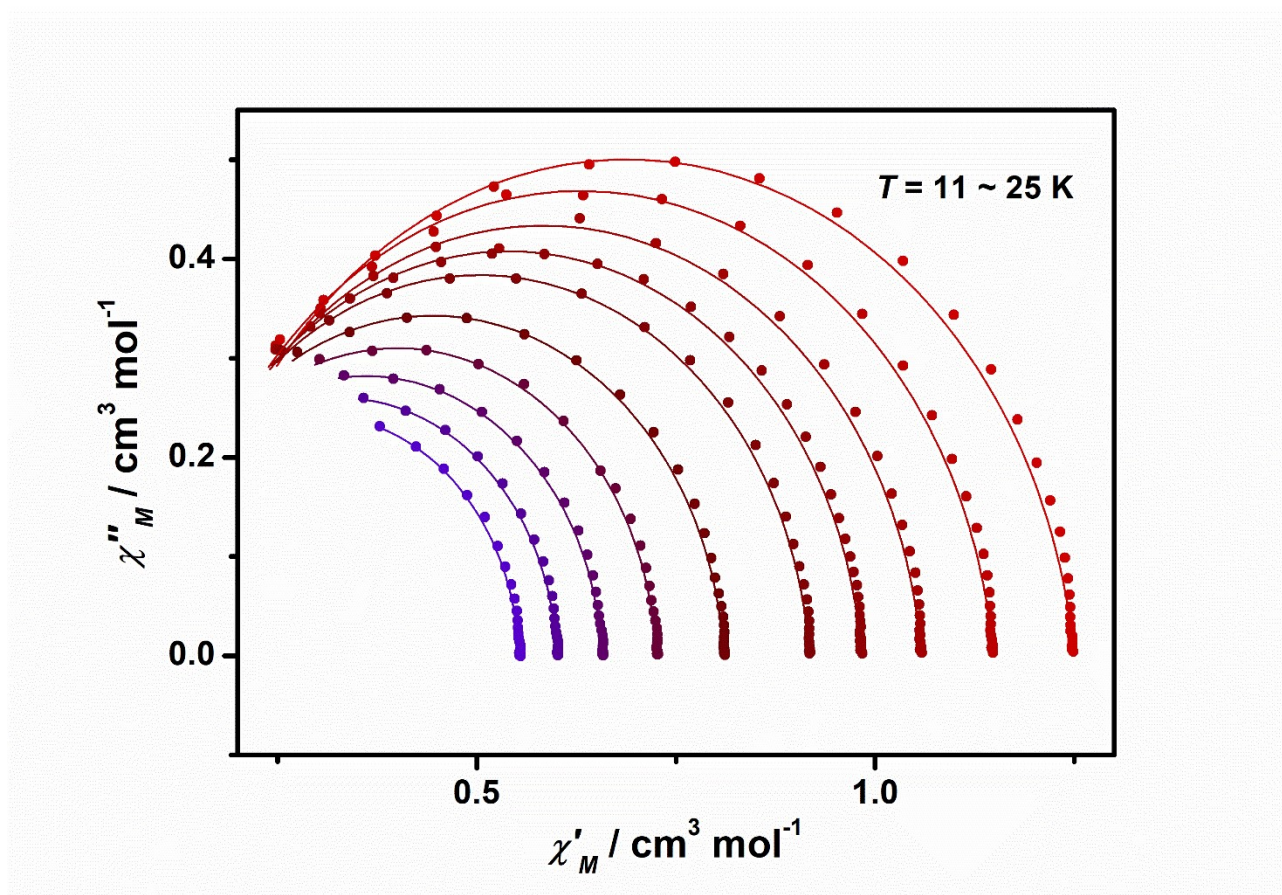

**Figure S11.** Cole–Cole plots for the AC susceptibilities under a zero DC field for **1** from 11–25 K. Solid lines represent fits of the data in Figure S6 using the generalized Debye model.

**Table S4.** Relaxation fitting parameters for **1** corresponding to Figure S10-12 using the generalized Debye model.

| $T / \text{K}$ | $\chi_{\infty} / \text{cm}^3 \text{mol}^{-1}$ | $\chi_s / \text{cm}^3 \text{mol}^{-1}$ | $\tau / \text{s}$  | $\alpha$         |
|----------------|-----------------------------------------------|----------------------------------------|--------------------|------------------|
| 2              | 6.57586(0.0109)                               | 0.58392(0.03064)                       | 7.60E-04(6.93E-06) | 0.10947(0.00469) |
| 3              | 4.46789(0.00778)                              | 0.39202(0.02122)                       | 8.02E-04(7.61E-06) | 0.11683(0.00484) |
| 4              | 3.38456(0.00601)                              | 0.29784(0.01622)                       | 8.18E-04(7.90E-06) | 0.1198(0.00491)  |
| 5              | 2.72641(0.00488)                              | 0.24214(0.01315)                       | 8.20E-04(7.98E-06) | 0.11999(0.00495) |
| 6              | 2.27996(0.00409)                              | 0.20572(0.01113)                       | 8.07E-04(7.91E-06) | 0.11752(0.00499) |
| 7              | 1.95887(0.00349)                              | 0.17778(0.00966)                       | 7.80E-04(7.62E-06) | 0.11211(0.00501) |
| 8              | 1.71646(0.00299)                              | 0.16206(0.00851)                       | 7.42E-04(7.16E-06) | 0.10359(0.005)   |
| 9              | 1.52708(0.00257)                              | 0.1488(0.0076)                         | 6.92E-04(6.54E-06) | 0.09365(0.00495) |
| 10             | 1.37462(0.00184)                              | 0.13805(0.00581)                       | 6.36E-04(4.92E-06) | 0.08196(0.00407) |
| 11             | 1.24971(0.00185)                              | 0.12578(0.00614)                       | 5.75E-04(5.03E-06) | 0.07365(0.00462) |
| 12             | 1.14791(0.00158)                              | 0.11298(0.00564)                       | 5.16E-04(4.35E-06) | 0.06297(0.00445) |
| 13             | 1.05784(0.00147)                              | 0.10875(0.0057)                        | 4.62E-04(4.17E-06) | 0.05714(0.00469) |
| 14             | 0.98226(8.10E-04)                             | 0.09874(0.00355)                       | 4.08E-04(2.39E-06) | 0.05083(0.00294) |
| 15             | 0.91706(7.40E-04)                             | 0.09094(0.00354)                       | 3.61E-04(2.21E-06) | 0.04667(0.003)   |
| 17             | 0.80965(5.43E-04)                             | 0.08017(0.00326)                       | 2.85E-04(1.76E-06) | 0.03925(0.00279) |
| 19             | 0.72473(6.27E-04)                             | 0.07525(0.00484)                       | 2.27E-04(2.27E-06) | 0.02922(0.00408) |
| 21             | 0.6568(3.36E-04)                              | 0.0651(0.00347)                        | 1.81E-04(1.42E-06) | 0.03042(0.00277) |
| 23             | 0.60026(2.71E-04)                             | 0.05894(0.00378)                       | 1.46E-04(1.35E-06) | 0.02613(0.00283) |
| 25             | 0.55295(3.15E-04)                             | 0.04729(0.00621)                       | 1.16E-04(1.90E-06) | 0.0265(0.00417)  |

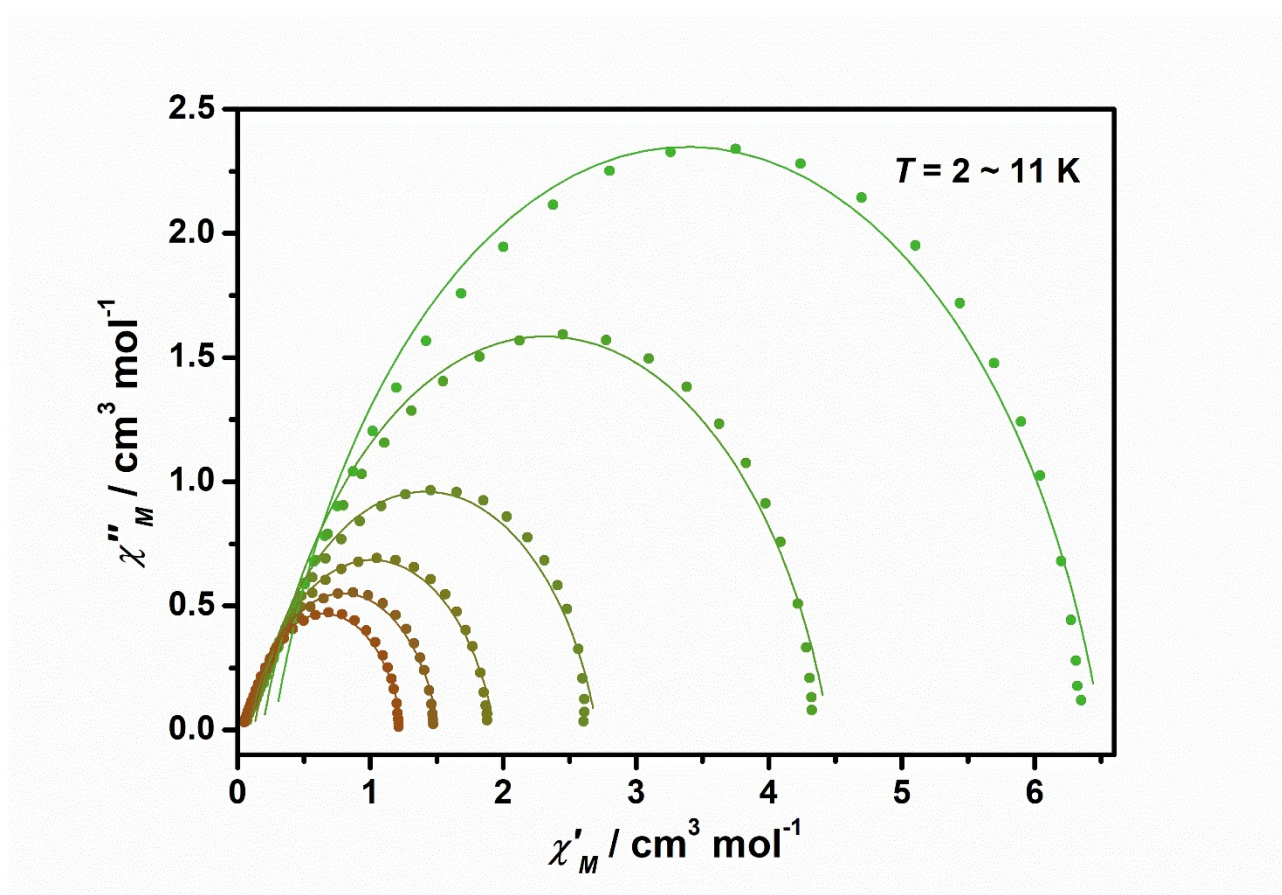

**Figure S12.** Cole–Cole plots for the AC susceptibilities under a zero DC field for **2** from 2–11 K. Solid lines represent fits of the data in Figure 4 using the generalized Debye model.

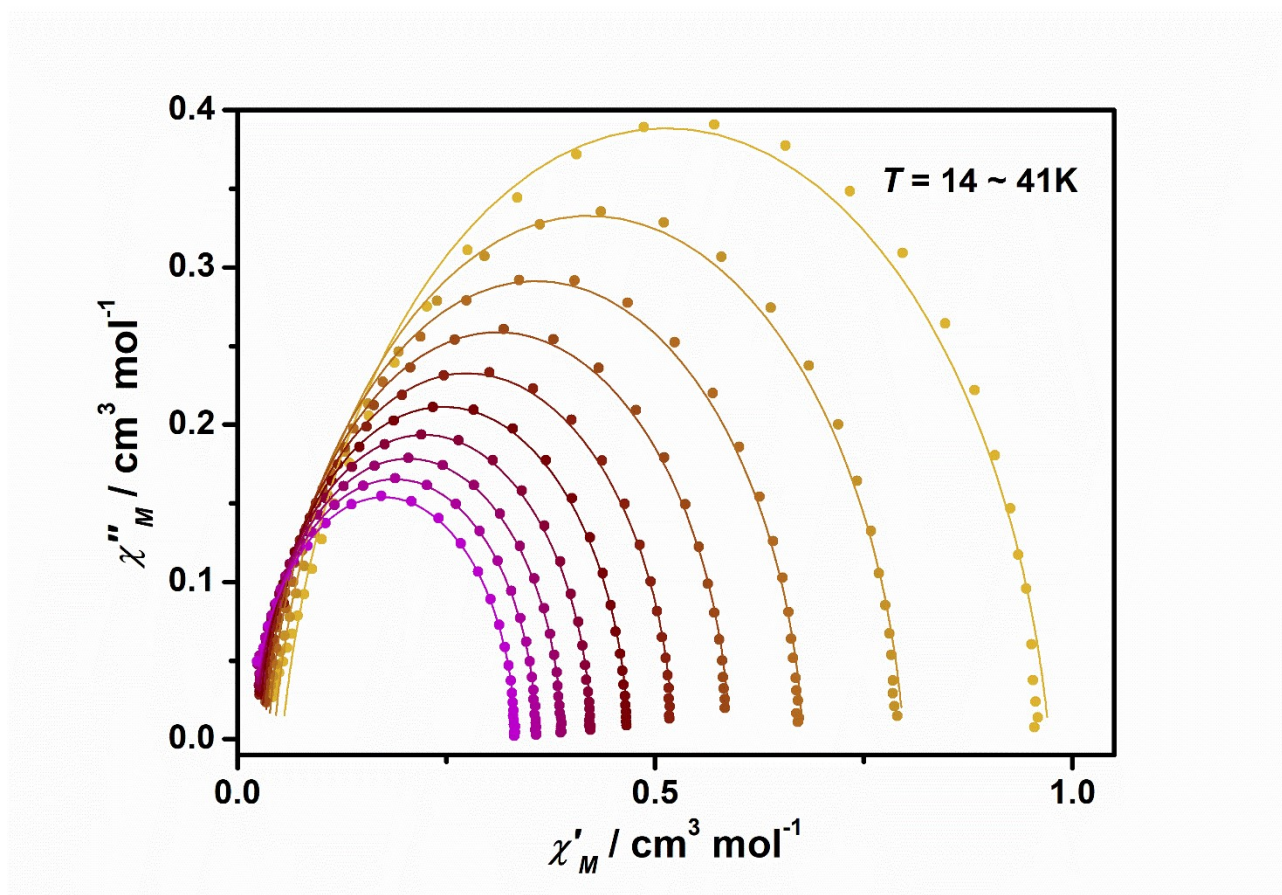

**Figure S13.** Cole–Cole plots for the AC susceptibilities under a zero DC field for **2** from 14–41 K. Solid lines represent fits of the data in Figure 4 using the generalized Debye model.



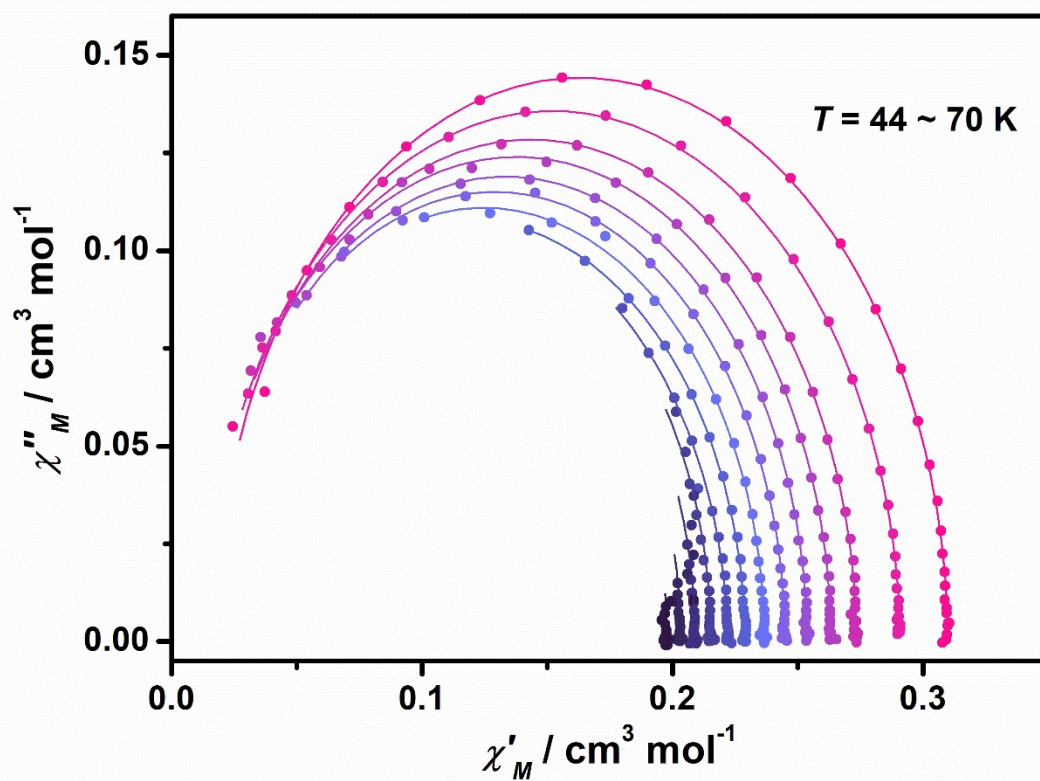

**Figure S14.** Cole–Cole plots for the AC susceptibilities under a zero DC field for **2** from 44-70 K. Solid lines represent fits of the data in Figure 4 using the generalized Debye model.

**Table S5** Relaxation fitting parameters for **2** corresponding to Figure S13-16 using the generalized Debye model.

| $T / \text{K}$ | $\chi_{\infty} / \text{cm}^3 \text{mol}^{-1}$ | $\chi_{\text{S}} / \text{cm}^3 \text{mol}^{-1}$ | $\tau / \text{s}$  | $\alpha$         |
|----------------|-----------------------------------------------|-------------------------------------------------|--------------------|------------------|
| 2              | 6.50003(0.03061)                              | 0.2721(0.02212)                                 | 0.02421(3.40E-04)  | 0.17716(0.00674) |
| 3              | 4.45148(0.02171)                              | 0.1853(0.01455)                                 | 0.02626(3.80E-04)  | 0.18604(0.00676) |
| 5              | 2.70614(0.01481)                              | 0.12225(0.00975)                                | 0.02741(4.43E-04)  | 0.18607(0.00754) |
| 7              | 1.93494(0.00911)                              | 0.09048(0.00602)                                | 0.02717(3.79E-04)  | 0.18645(0.00651) |
| 9              | 1.51338(0.00708)                              | 0.07519(0.00488)                                | 0.02468(3.42E-04)  | 0.16869(0.0067)  |
| 11             | 1.24046(0.00552)                              | 0.06519(0.00407)                                | 0.02101(2.77E-04)  | 0.14297(0.00669) |
| 14             | 0.9721(0.00354)                               | 0.05332(0.00296)                                | 0.01531(1.68E-04)  | 0.10609(0.00592) |
| 17             | 0.79793(0.00238)                              | 0.04385(0.00214)                                | 0.01076(9.43E-05)  | 0.0792(0.005)    |
| 20             | 0.67729(0.00149)                              | 0.03675(0.00153)                                | 0.00758(5.11E-05)  | 0.06002(0.00396) |
| 23             | 0.58982(0.00119)                              | 0.03221(0.00115)                                | 0.00541(2.94E-05)  | 0.0472(0.00334)  |
| 26             | 0.52157(9.08E-04)                             | 0.02823(0.00102)                                | 0.00392(1.96E-05)  | 0.03705(0.00311) |
| 29             | 0.46776(5.57E-04)                             | 0.02526(7.10E-04)                               | 0.00291(1.05E-05)  | 0.02876(0.00227) |
| 32             | 0.42391(4.24E-04)                             | 0.02255(6.13E-04)                               | 0.0022(7.02E-06)   | 0.02287(0.00202) |
| 35             | 0.38838(3.25E-04)                             | 0.0203(5.31E-04)                                | 0.00171(4.80E-06)  | 0.01954(0.00179) |
| 38             | 0.35812(2.33E-04)                             | 0.01906(4.28E-04)                               | 0.00135(3.11E-06)  | 0.01557(0.00147) |
| 41             | 0.33234(2.64E-04)                             | 0.01735(5.45E-04)                               | 0.00108(3.22E-06)  | 0.01475(0.00189) |
| 44             | 0.30997(2.69E-04)                             | 0.01695(6.24E-04)                               | 8.85E-04(3.05E-06) | 0.00983(0.00219) |
| 47             | 0.29086(2.22E-04)                             | 0.01354(5.93E-04)                               | 7.15E-04(2.35E-06) | 0.01343(0.00204) |
| 50             | 0.27342(1.69E-04)                             | 0.01342(5.23E-04)                               | 5.73E-04(1.67E-06) | 0.00769(0.00177) |
| 52             | 0.26333(2.09E-04)                             | 0.01208(7.49E-04)                               | 4.75E-04(1.97E-06) | 0.00813(0.00243) |
| 54             | 0.25374(1.21E-04)                             | 0.01341(5.26E-04)                               | 3.80E-04(1.11E-06) | 0.00644(0.00161) |
| 56             | 0.24492(1.07E-04)                             | 0.01299(6.25E-04)                               | 2.84E-04(9.88E-07) | 0.00506(0.00171) |
| 58             | 0.23672(1.82E-04)                             | 0.01259(0.00161)                                | 2.00E-04(1.84E-06) | 0.00625(0.00368) |
| 60             | 0.22909(1.05E-04)                             | 0.00878(0.00176)                                | 1.28E-04(1.34E-06) | 0.01356(0.00295) |
| 62             | 0.22213(1.57E-04)                             | 0(0.00623)                                      | 7.67E-05(2.81E-06) | 0.02147(0.0067)  |
| 64             | 0.21519(1.88E-04)                             | 0(0.01847)                                      | 4.79E-05(5.03E-06) | 0(0.01302)       |
| 66             | 0.20902(2.36E-04)                             | 0(0.06054)                                      | 2.92E-05(9.97E-06) | 0(0.02713)       |
| 68             | 0.20325(2.77E-04)                             | 0(0.19543)                                      | 1.75E-05(1.91E-05) | 0(0.05436)       |
| 70             | 0.19782(3.62E-04)                             | 0(0.8101)                                       | 9.84E-06(4.39E-05) | 0(0.12997)       |

## Computational details

Complete-active-space self-consistent field (CASSCF) calculations on mononuclear complexes **1** and **2** (see Figure S1 for the calculated complete structures) on the basis of single-crystal X-ray structures have been carried out with OpenMolcas<sup>S1</sup> program package.

The basis sets for all atoms are atomic natural orbitals from the ANO-RCC library: ANO-RCC-VTZP for Dy<sup>III</sup>; VDZP for close Cl and I; VTZ for close N and O; VDZ for distant atoms. The calculations employed the second order Douglas-Kroll-Hess Hamiltonian, where scalar relativistic contractions were taken into account in the basis set. And then, the spin-orbit couplings were handled separately in the restricted active space state interaction (RASSI-SO) procedure<sup>S2-S3</sup>. Active electrons in 7 active orbitals include all *f* electrons (CAS (9 in 7) in the CASSCF calculation. To exclude all the doubts, we calculated all the roots in the active space. We have mixed the maximum number of spin-free state which was possible with our hardware (all from 21 sextets, 128 from 224 quadruplets, 130 from 490 doublets). SINGLE\_ANISO<sup>S4-S6</sup> program was used to obtain the energy levels, *g* tensors, magnetic axes, *et al.* based on the above CASSCF/RASSI-SO calculations.

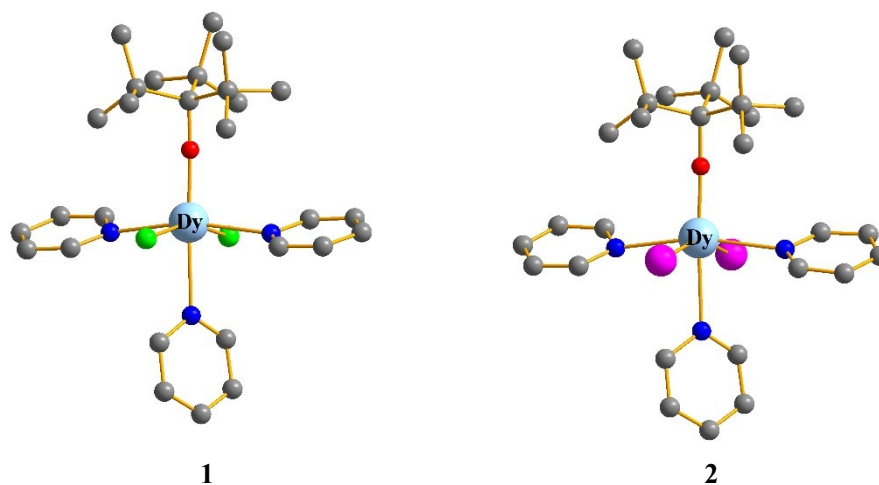

**Figure S15.** Calculated complete structures of complexes **1** and **2**. H atoms are omitted for clarity.

**Table S6.** Calculated energy levels ( $\text{cm}^{-1}$ ),  $\mathbf{g}$  ( $g_x, g_y, g_z$ ) tensors and predominant  $m_J$  values of the lowest eight Kramers doublets (KDs) of complexes **1** and **2** using CASSCF/RASSI-SO with OpenMolcas.

| KDs | <b>1</b> |              |            | <b>2</b> |              |            |
|-----|----------|--------------|------------|----------|--------------|------------|
|     | $E$      | $\mathbf{g}$ | $m_J$      | $E$      | $\mathbf{g}$ | $m_J$      |
| 1   | 0.0      | 0.009        | $\pm 15/2$ | 0.0      | 0.001        | $\pm 15/2$ |
|     |          | 0.013        |            |          | 0.001        |            |
|     |          | 19.837       |            |          | 19.879       |            |
| 2   | 319.3    | 0.391        | $\pm 13/2$ | 374.7    | 0.020        | $\pm 13/2$ |
|     |          | 0.678        |            |          | 0.024        |            |
|     |          | 16.558       |            |          | 17.004       |            |
| 3   | 489.2    | 3.516        | $\pm 11/2$ | 651.1    | 0.205        | $\pm 11/2$ |
|     |          | 4.958        |            |          | 0.239        |            |
|     |          | 12.823       |            |          | 13.876       |            |
| 4   | 584.8    | 7.932        | $\pm 7/2$  | 771.0    | 3.132        | $\pm 9/2$  |
|     |          | 5.699        |            |          | 3.517        |            |
|     |          | 0.338        |            |          | 14.394       |            |
| 5   | 703.6    | 2.000        | $\pm 3/2$  | 841.5    | 8.380        | $\pm 7/2$  |
|     |          | 2.756        |            |          | 4.939        |            |
|     |          | 11.051       |            |          | 1.251        |            |
| 6   | 732.9    | 0.137        | $\pm 1/2$  | 903.2    | 1.274        | $\pm 3/2$  |
|     |          | 1.993        |            |          | 3.873        |            |
|     |          | 17.245       |            |          | 14.945       |            |
| 7   | 768.5    | 1.085        | $\pm 5/2$  | 973.6    | 0.124        | $\pm 1/2$  |
|     |          | 1.300        |            |          | 0.963        |            |
|     |          | 17.130       |            |          | 17.312       |            |
| 8   | 828.5    | 0.136        | $\pm 9/2$  | 1025.5   | 0.272        | $\pm 5/2$  |
|     |          | 0.307        |            |          | 1.012        |            |
|     |          | 19.088       |            |          | 18.041       |            |

**Table S7.** Wave functions with definite projection of the total moment  $|m_J\rangle$  for the lowest eight KDs for complexes **1** and **2** using CASSCF/RASSI-SO with OpenMolcas.

|          | $E/\text{cm}^{-1}$ | wave functions                                                                                                              |
|----------|--------------------|-----------------------------------------------------------------------------------------------------------------------------|
| <b>1</b> | 0.0                | 99.5% $ \pm 15/2\rangle$                                                                                                    |
|          | 319.3              | 94.5% $ \pm 13/2\rangle$                                                                                                    |
|          | 489.2              | 35.2% $ \pm 11/2\rangle$ +22.6% $ \pm 3/2\rangle$ +17.9% $ \pm 1/2\rangle$ +10.1% $ \pm 7/2\rangle$ +6.6% $ \pm 5/2\rangle$ |
|          | 584.8              | 51.3% $ \pm 11/2\rangle$ +24.1% $ \pm 1/2\rangle$ +12.5% $ \pm 9/2\rangle$ +9.2% $ \pm 5/2\rangle$                          |
|          | 703.6              | 46.2% $ \pm 9/2\rangle$ +21.0% $ \pm 3/2\rangle$ +14.9% $ \pm 7/2\rangle$ +8.5% $ \pm 11/2\rangle$                          |
|          | 732.9              | 26.5% $ \pm 1/2\rangle$ +25.8% $ \pm 5/2\rangle$ +22.2% $ \pm 3/2\rangle$ +16.3% $ \pm 7/2\rangle$                          |
|          | 768.5              | 26.8% $ \pm 7/2\rangle$ +24.8% $ \pm 5/2\rangle$ +18.3% $ \pm 9/2\rangle$ +16.3% $ \pm 3/2\rangle$ +11.6% $ \pm 1/2\rangle$ |
|          | 828.5              | 30.9% $ \pm 7/2\rangle$ +26.7% $ \pm 5/2\rangle$ +16.9% $ \pm 3/2\rangle$ +14.5% $ \pm 1/2\rangle$ +9.4% $ \pm 9/2\rangle$  |
|          | <b>2</b>           | 0.0                                                                                                                         |
| 374.7    |                    | 99.3% $ \pm 13/2\rangle$                                                                                                    |
| 651.1    |                    | 93.2% $ \pm 11/2\rangle$                                                                                                    |
| 771.0    |                    | 37.6% $ \pm 1/2\rangle$ +27.5% $ \pm 9/2\rangle$ +14.4% $ \pm 5/2\rangle$ +11.1% $ \pm 3/2\rangle$                          |
| 841.5    |                    | 52.7% $ \pm 9/2\rangle$ +24.9% $ \pm 3/2\rangle$ +11.9% $ \pm 7/2\rangle$ +8.0% $ \pm 1/2\rangle$                           |
| 903.2    |                    | 42.5% $ \pm 7/2\rangle$ +41.6% $ \pm 5/2\rangle$ +9.0% $ \pm 3/2\rangle$                                                    |
| 973.6    |                    | 41.6% $ \pm 1/2\rangle$ +27.9% $ \pm 3/2\rangle$ +12.0% $ \pm 7/2\rangle$ +12.0% $ \pm 9/2\rangle$                          |
| 1025.5   |                    | 38.3% $ \pm 5/2\rangle$ +25.3% $ \pm 7/2\rangle$ +22.6% $ \pm 3/2\rangle$ +10.5% $ \pm 1/2\rangle$                          |

**Table S8.** LoProp charge of each atom corresponding to complexes **1** and **2**.

|          | Dy1    | X1      | X2      | O1      | N1      | N2      | N3      |
|----------|--------|---------|---------|---------|---------|---------|---------|
| <b>1</b> | 2.4108 | -0.8556 | -0.8611 | -1.0559 | -0.3814 | -0.3839 | -0.3435 |
| <b>2</b> | 2.3353 | -0.8199 | -0.8101 | -1.0652 | -0.3895 | -0.3923 | -0.3657 |

The theoretically predicted effective barrier as a function of temperature has the form<sup>S7,S8</sup>

$$U_{eff}(T) = \sum_{i=1}^n \frac{K_i(T)}{N} E_i \quad (S1)$$

$$N = \sum_i k_i(T) \quad (S2)$$

Each KD has a particular demagnetization rate which is:

$$K_i(T) = \frac{\exp(-E_i / k_B T)}{Z} k_{QT,i} \quad (S3)$$

Where  $i$  is the index of each KD,  $E_i$  represents the doublet energy obtained through CASSCF calculations,

$$Z = \sum_i \exp\left(\frac{-E_i}{k_B T}\right) \quad \text{is the partition function, } k_B \text{ is the Boltzmann constant, and } k_{QT,i} = \frac{g_{XY,i}^2}{2\sqrt{g_{XY,i}^2 + g_{Z,i}^2}} \text{ is the}$$

tunneling relaxation rate for doublet  $i$ . The coefficient  $\frac{K_i(T)}{\sum_i K_i(T)}$  before  $E_i$  in equation (S1) represents the relative

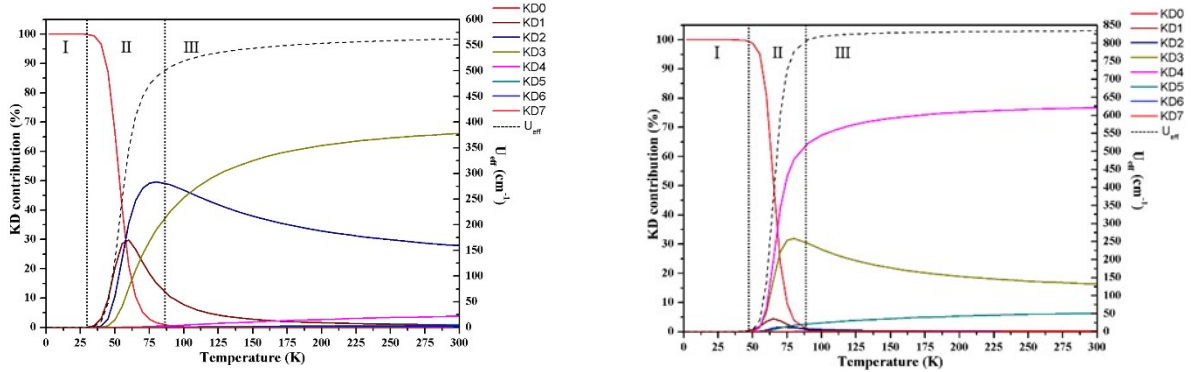

contribution of corresponding KD to relaxation.

1

2

**Figure S16** Predicted effective energy barriers and relaxation contributions from various KDs of complexes **1** and **2**.  $U_{eff}$  is represented as a dashed black line, and its value is indicated on the right  $y$ -axis. The left  $y$ -axis represents the relative contribution of each KD to relaxation.

According to the method for the prediction of tunneling demagnetization time ( $\tau_{QTM}$ ) proposed by Aravena *et al.*,<sup>S7,S8</sup> we calculated the value of  $\tau_{QTM}$  according to equations (S4)–(S5).

$$\tau_{QTM} = \frac{1}{2k} \quad (S4)$$

$$k = \frac{\beta B_{ave}}{h} \cdot \frac{g_{XY}^2}{2(g_{XY}^2 + g_Z^2)^{\frac{1}{2}}} \quad (S5)$$

Where  $g_{XY}^2 = (g_X^2 + g_Y^2)$ ,  $k$  is the rate of ground state QTM. As usual, the magnitude of the magnetic fields, arising

from both dipolar and hyperfine interactions, is of a few tens of mini-Tesla (mT). Thus, in this work,  $B_{\text{ave}}$  is set to be 20 mT.

**Table S9.** Values of  $B_{\text{ave}}$ , principal values of the  $\mathbf{g}$ -tensor of the lowest KD and the QTM time ( $\tau_{\text{QTM}}$ ).

| Compound | $B_{\text{ave}}$ (mT) | $g_X$                   | $g_Y$                   | $g_Z$   | $\tau_{\text{QTM}}$ (s) |
|----------|-----------------------|-------------------------|-------------------------|---------|-------------------------|
| <b>2</b> | 20                    | $0.8576 \times 10^{-3}$ | $0.1304 \times 10^{-2}$ | 19.8372 | $2.91 \times 10^{-4}$   |
| <b>1</b> | 20                    | $0.1136 \times 10^{-3}$ | $0.1411 \times 10^{-3}$ | 19.8791 | $2.16 \times 10^{-2}$   |

**Table S10** Weight of calculated crystal-field parameter  $B(k, q)$  of complexes **1** and **2**.

| $B(k, q)$ |     | <b>1</b> | <b>2</b> |
|-----------|-----|----------|----------|
| $k$       | $q$ |          |          |
| 2         | 0   | 30.57%   | 38.42%   |
| 4         | 0   | 14.03%   | 12.86%   |
| 6         | 0   | 2.46%    | 2.82%    |
| 2         | -2  | 2.18%    | 0.88%    |
| 2         | -1  | 4.04%    | 2.68%    |
| 2         | 1   | 1.51%    | 2.13%    |
| 2         | 2   | 11.67%   | 8.09%    |
| 4         | -4  | 0.37%    | 0.47%    |
| 4         | -3  | 0.04%    | 0.50%    |
| 4         | -2  | 1.13%    | 0.96%    |
| 4         | -1  | 3.16%    | 2.38%    |
| 4         | 1   | 1.58%    | 1.94%    |
| 4         | 2   | 0.72%    | 2.89%    |
| 4         | 3   | 0.69%    | 1.05%    |
| 4         | 4   | 12.70%   | 8.99%    |
| 6         | -6  | 0.76%    | 0.10%    |
| 6         | -5  | 1.30%    | 1.09%    |
| 6         | -4  | 0.24%    | 0.02%    |
| 6         | -3  | 0.08%    | 0.27%    |
| 6         | -2  | 0.52%    | 0.57%    |
| 6         | -1  | 0.65%    | 0.89%    |
| 6         | 1   | 0.79%    | 0.66%    |
| 6         | 2   | 0.34%    | 0.82%    |
| 6         | 3   | 0.45%    | 0.38%    |
| 6         | 4   | 3.83%    | 2.75%    |
| 6         | 5   | 0.64%    | 0.68%    |
| 6         | 6   | 2.35%    | 3.37%    |

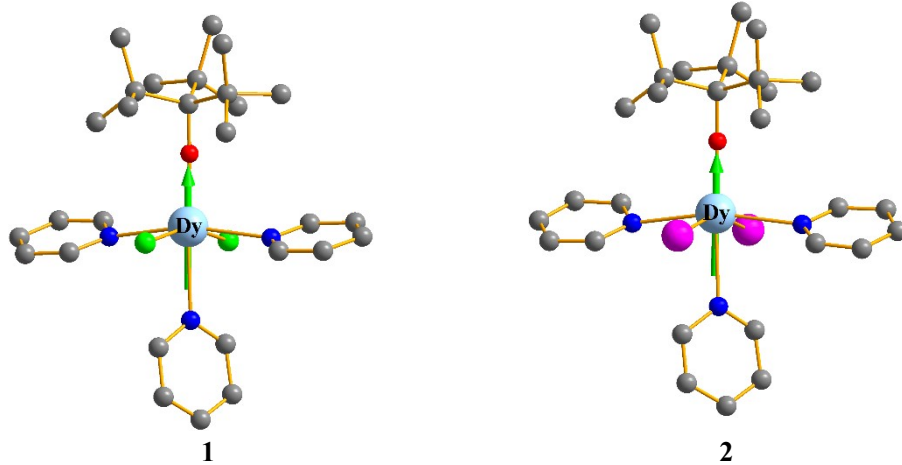

**Figure S17** Calculated orientation of the local main magnetic axis on complexes **1** and **2**.



## References:

- S1 Galván, I. F.; Vacher, M.; Alavi, A.; Angeli, C.; Aquilante, F.; Autschbach, J.; Bao, J. J.; Bokarev, S. I.; Bogdanov, N. A.; Carlson, R. K.; Chibotaru, L. F.; Creutzberg, J.; Dattani, N.; Delcey, M. G.; Dong, S. S.; Dreuw, A.; Freitag, L.; Frutos, L. M.; Gagliardi, L.; Gendron, F.; Giussani, A.; González, L.; Grell, G.; Guo, M. Y.; Hoyer, C. E.; Johansson, M.; Keller, S.; Knecht, S.; Kovacevic, G.; Källman, E.; Manni, G. L.; Lundberg, M.; Ma, Y. J.; Mai, S.; Malhado, J. P.; Malmqvist, P. Å.; Marquetand, P.; Mewes, S. A.; Norell, J.; Olivucci, M.; Oppel, M.; Phung, Q. M.; Pierloot, K.; Plasser, F.; Reiher, M.; Sand, A. M.; Schapiro, I.; Sharma, P.; Stein, C. J.; Sørensen, L. K.; Truhlar, D. G.; Ugandi, M.; Ungur, L.; Valentini, A.; Vancoillie, S.; Veryazov, V.; Weser, O.; Wesołowski, T. A.; Widmark, Per-Olof.; Wouters, S.; Zech, A.; Zobel, J. P.; Lindh. R. *J. Chem. Theory Comput.* **2019**, *15*, 5925–5964.
- S2 Malmqvist, P. Å.; Roos, B. O.; Schimmelpfennig, B. *Chem. Phys. Lett.*, **2002**, *357*, 230–240.
- S3 Heß, B. A.; Marian, C. M.; Wahlgren, U.; Gropen, O. *Chem. Phys. Lett.*, **1996**, *251*, 365–371.
- S4 Chibotaru, L. F.; Ungur, L.; Soncini, A. *Angew. Chem., Int. Ed.* **2008**, *47*, 4126–4129.
- S5 Ungur, L.; Van den Heuvel, W.; Chibotaru, L. F. *New J. Chem.* **2009**, *33*, 1224–1230.
- S6 Chibotaru, L. F.; Ungur, L.; Aronica, C.; Elmoll, H.; Pilet, G.; Luneau, D. *J. Am. Chem. Soc.* **2008**, *130*, 12445–12455.
- S7 Daniel, A.; *J. Phys. Chem. Lett.* **2018**, *9*, 5327–5333.
- S8 Yin, B.; Li, C. C.; *Phys. Chem. Chem. Phys.* **2020**, *22*, 9923–9933.
